# Supplementary material
Source: PubMed Central journal article supplement (PMC3122917)

## Figure S Other plasma fatty acids stimulate AMPK and Akt phosphorylation

**A.** L6 myoblasts were differentiated into myotubes and kept in medium with 10% FBS in the following 24 hrs. Then L6 myotubes were treated with 300  $\mu$ M PA for the times indicated, and p-Akt was detected by Western blotting. **B, C, D, E.** L6 myoblasts were treated with linoleic acid (LA)(B), oleic acid (OA)(C), stearic acid (SA) (D), and the combination of PA, LA, OA, and SA (PA:LA:OA:SA=2.77:2.56:1.77:1, MA) (E) at the indicated concentrations for 30 min, and cell lysates were obtained and subjected to Western blotting. **F.** Time frame of PA treatment of rat skeletal muscle strips.

### Supplemental data

#### Figure S

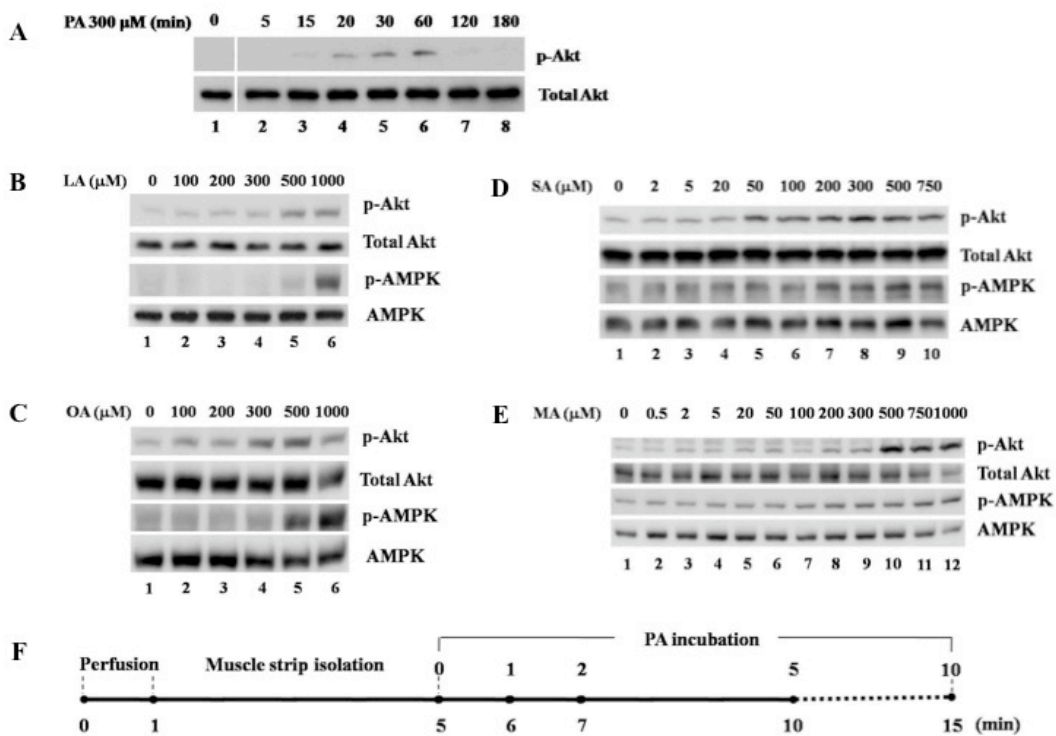

Supplement: supp_M011254_jlr.M011254-1.pdf [file supp_M011254_jlr.M011254-1.pdf]
